# Supplementary material for: A High-Throughput Search for SFXN1 Physical Partners Led to the Identification of ATAD3, HSD10 and TIM50
Source: MDPI journal article supplement (doi:10.3390/biology11091298), 2022-08-31
Supplement: s1 [file s1]

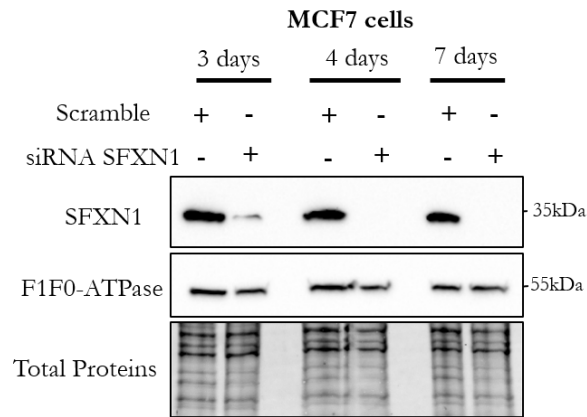

**Figure S1.** Specificity of the anti-SFXN1 antibody used for immunoblotting. MCF7 cells were transfected with a pool of SFXN1 siRNA (sc-91814, Santa Cruz Biotechnology), and protein extracts were prepared at 3, 4 and 7 days post-transfection. SFXN1 levels were assessed with Western blot using a rabbit anti-SFXN1 antibody (Sigma-Aldrich Cat# HPA019543, RRID:AB\_1856789). The ATP5b subunit of the F1F0-ATPase is used as a loading control. Stain-free detection of total proteins is also shown.

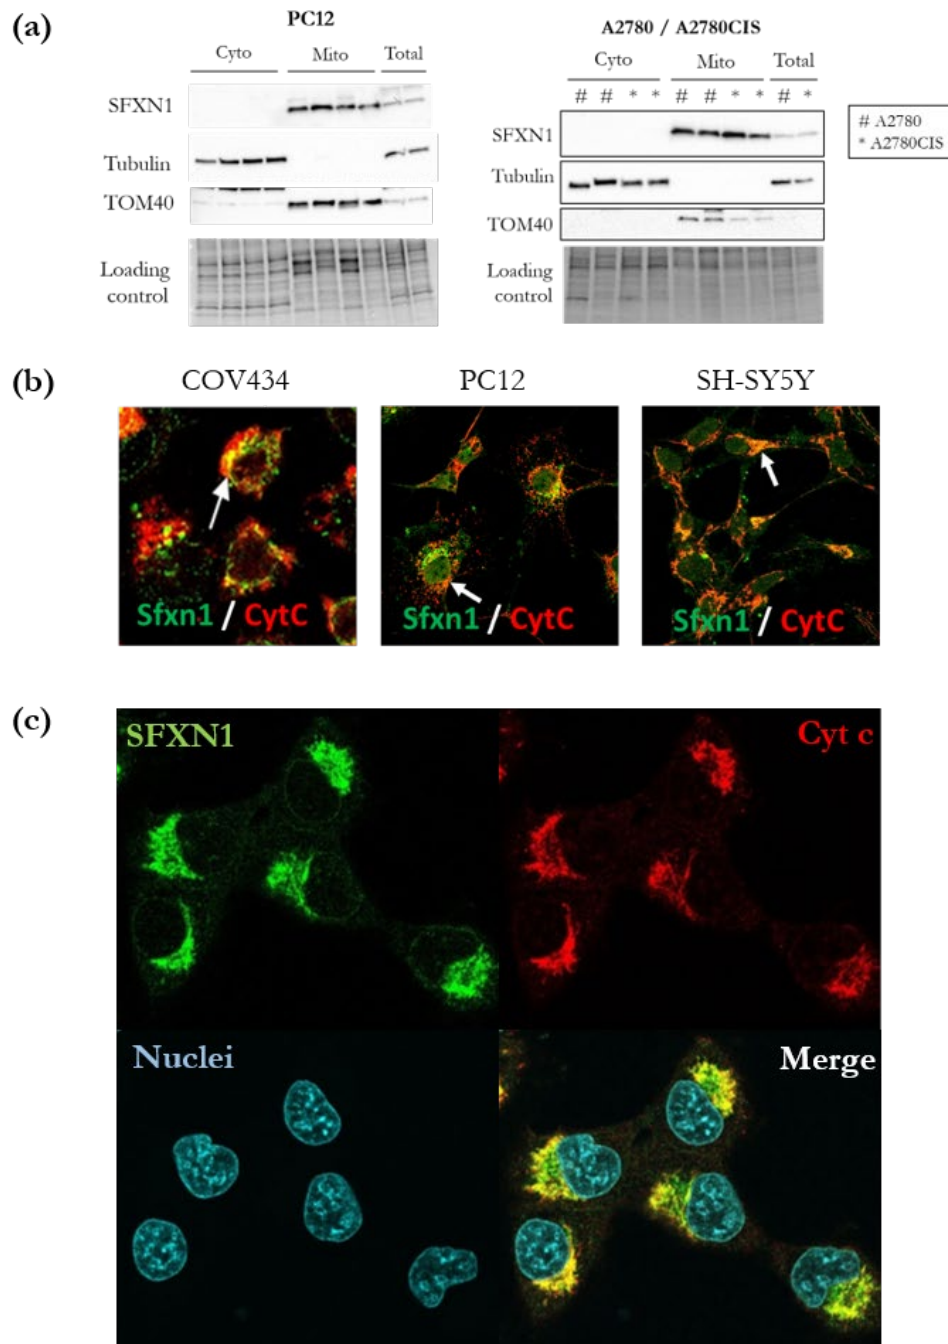

**Figure S2.** SFXN1 is a mitochondrial protein. **(a)** SFXN1 is detected in mitochondria-enriched fractions from PC12, A2780 and A2780CIS cells but not in cytosolic fractions. Western blot analysis of SFXN1 levels was performed with a rabbit specific anti-SFXN1 antibody (Sigma-Aldrich Cat# HPA019543, RRID:AB\_1856789). TOM40 is shown to check the purity of the cytosolic fractions. As expected, Tubulin is only detected in cytosolic fractions, proving the absence of contamination of the mitochondrial fraction by cytosolic proteins. **(b)** SFXN1 colocalizes with cytochrome c in COV434, PC12 and SH-SY5Y. Immunostaining was performed with a rabbit specific anti-SFXN1 antibody (Sigma-Aldrich Cat# HPA019543, RRID:AB\_1856789), and images were acquired by confocal fluorescence imaging. **(c)** Immunodetection of SFXN1 and cytochrome c (mitochondrial staining) in MCF7 cells. A representative image obtained by confocal imaging is shown.

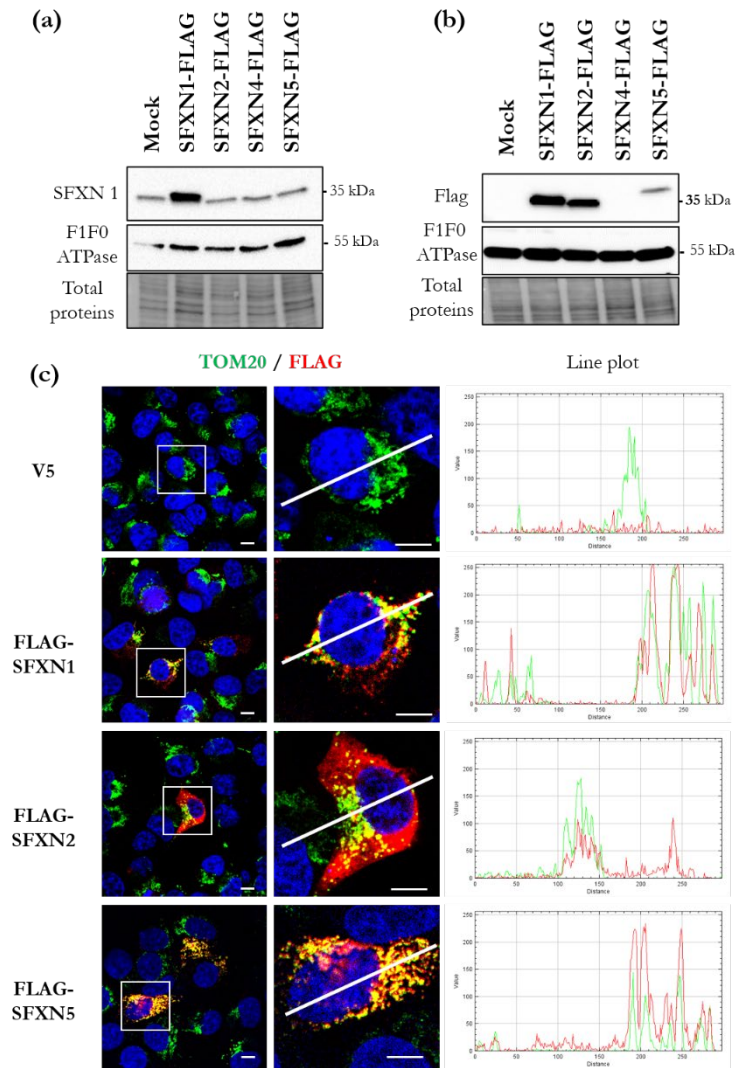

**Figure S3.** FLAG-tagged SFXN1, SFXN2 and SFXN5 proteins colocalize with mitochondria. **(a,b)** Transient transfection of HEK293 cells with SFXN expression vectors (Genscript). HEK293 cells were transiently transfected with an empty vector or plasmids encoding FLAG-tagged SFXN1, SFXN2, SFXN4 or SFXN5. Western blot analysis was performed using a polyclonal anti-SFXN1 antibody or an anti-FLAG antibody. Total protein amount was observed using stain-free labeling before SFXN1, FLAG and F1F0-ATPase revelation. **(c)** Immunofluorescence assay on MCF7 cells transfected with V5 tag or with different FLAG-SFXNs. Cells were stained for TOM20 (green) and exogenous SFXNs using anti-FLAG antibody (red). The fluorescence intensities along the lines are shown as line profile graphs. Scale bar: 10  $\mu$ m.

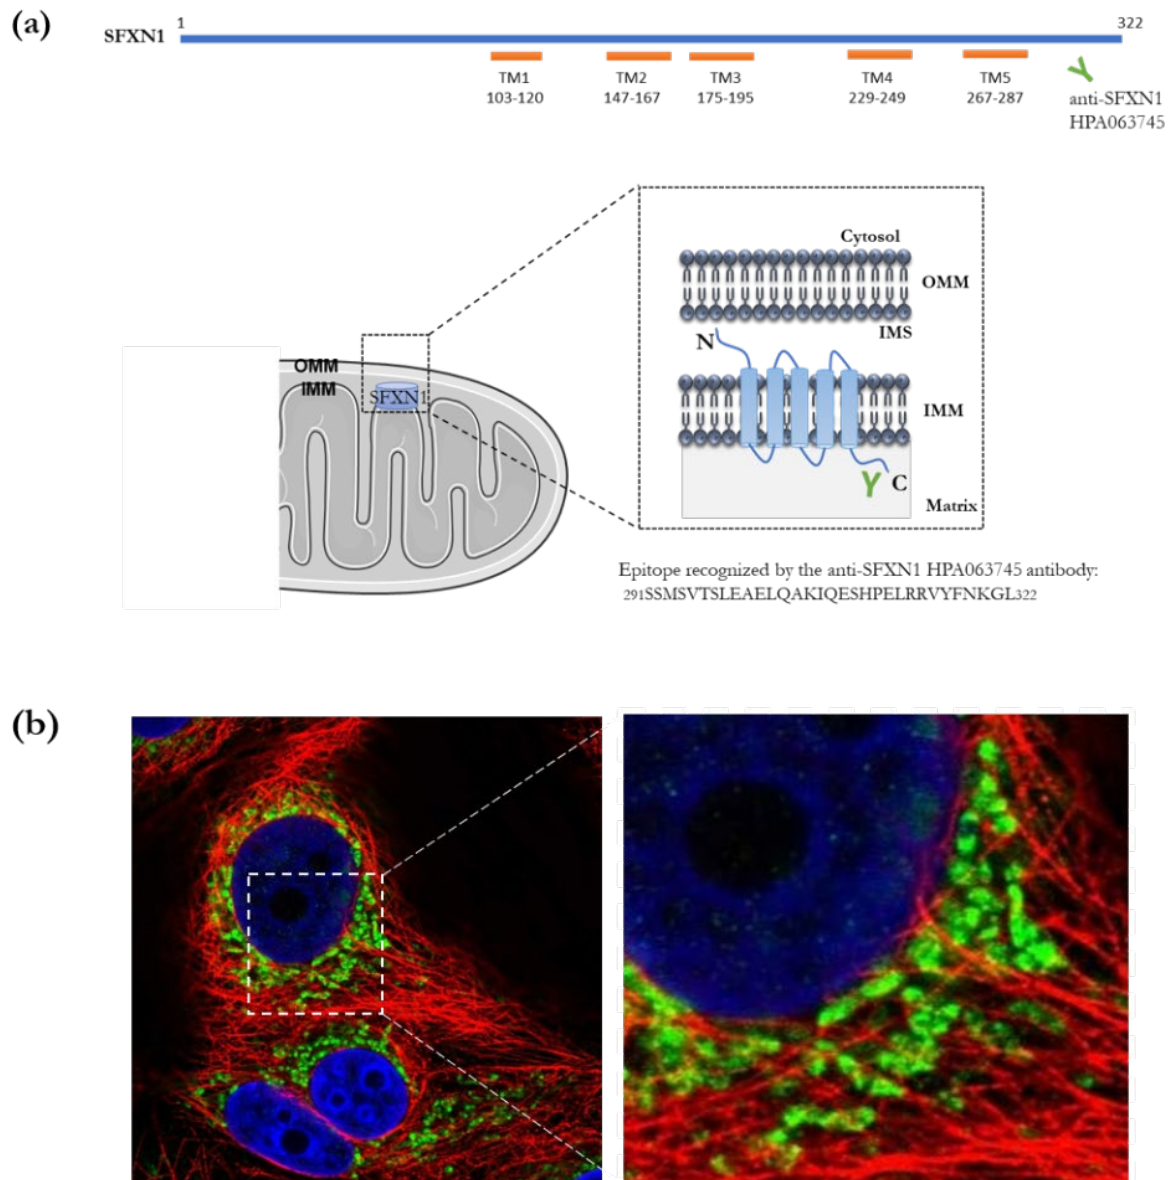

**Figure S4.** Immunostaining of MCF7 cells with the HPA063745 antibody reveals a mitochondrial pattern. (a) Scheme of human SFXN1 protein (1–322 amino acids) and its topology. The orange bars correspond to transmembrane helices (TM). The epitope recognized by the Atlas Antibody HPA063745 (Sigma-Aldrich) is present at the C-terminus of the SFXN1 protein (aa291–322, SSMSVTSLEAELQAKIQESHPELRRVYFNKGL), which is probably located in the mitochondrial matrix. (b) Immunostaining of MCF7 cells with the HPA063745 antibody reveals spots presumed to be mitochondria. Image credit: Human Protein Atlas, available at <http://www.proteinatlas.org> (accessed on 15 April 2020), image 63745/SFXN1/IF available from version v19.2.proteinatlas.org. Cells were stained using an anti-SFXN1 antibody (green) or an anti-microtubules antibody (red). Nuclei are stained in blue (DAPI). Scale bar: 10 μm.

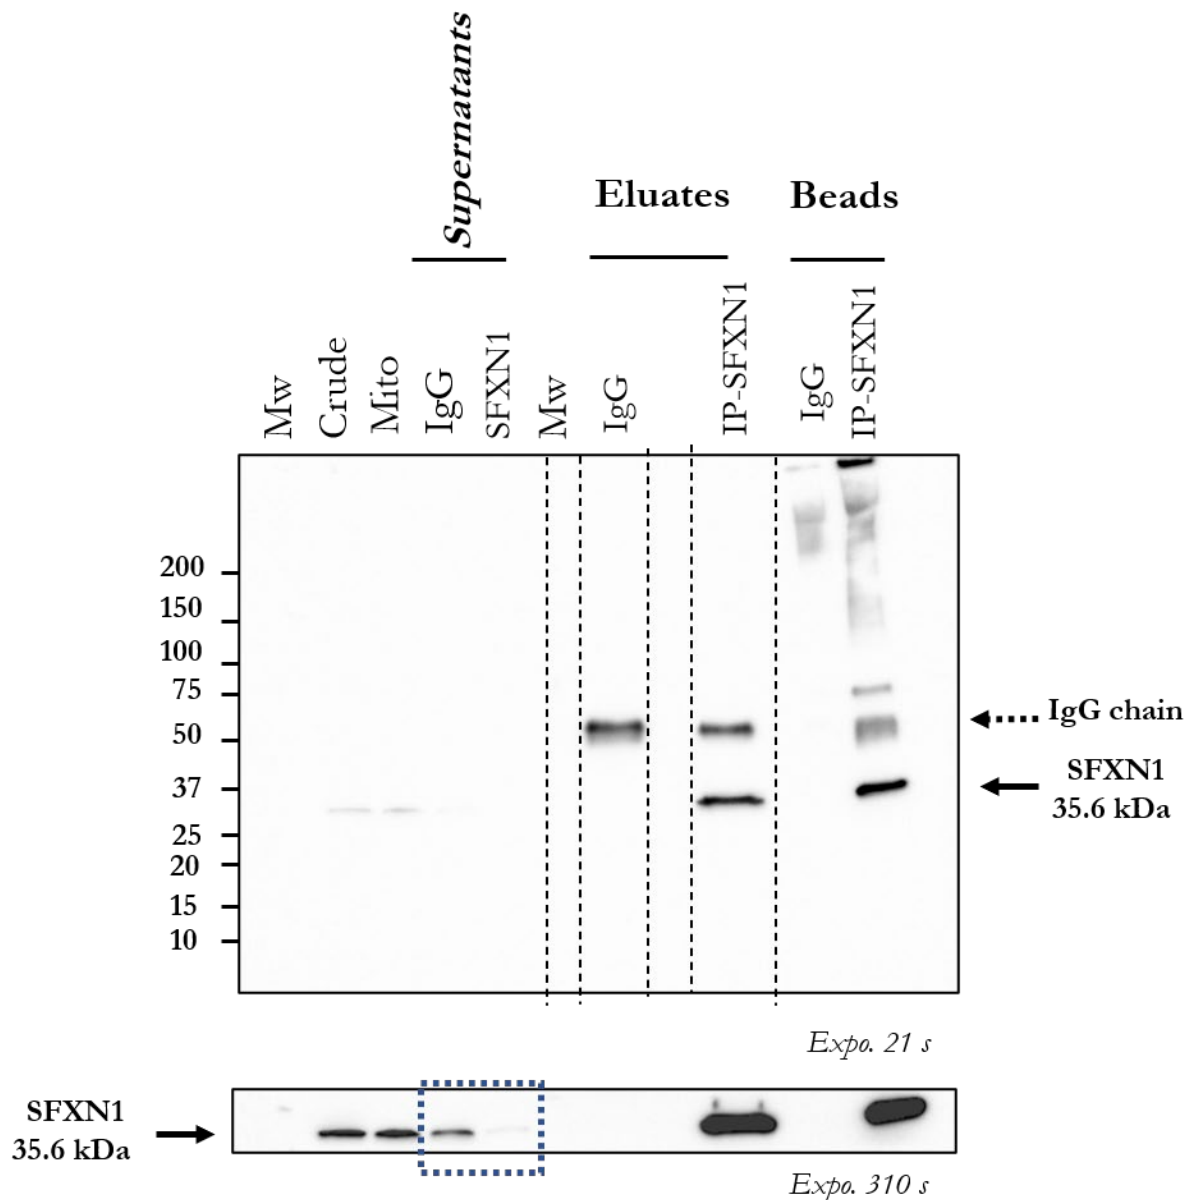

**Figure S5.** SFXN1 is successfully immunoprecipitated from mitochondria-enriched fractions from MCF7 cells using a specific antibody recognizing its C-terminus (Atlas Antibody HPA063745, Sigma-Aldrich). An isotypic control (anti-Rabbit IgG 12–370, Merck Millipore) was used to show the specificity of SFXN1 IP. After two rounds of elution, beads were conserved and loaded to control the efficiency of elution: a significant amount of protein remained on the beads. A longer exposure is provided to show the depletion of SFXN1 in supernatants from SFXN1 IP compared with control IgG IP.

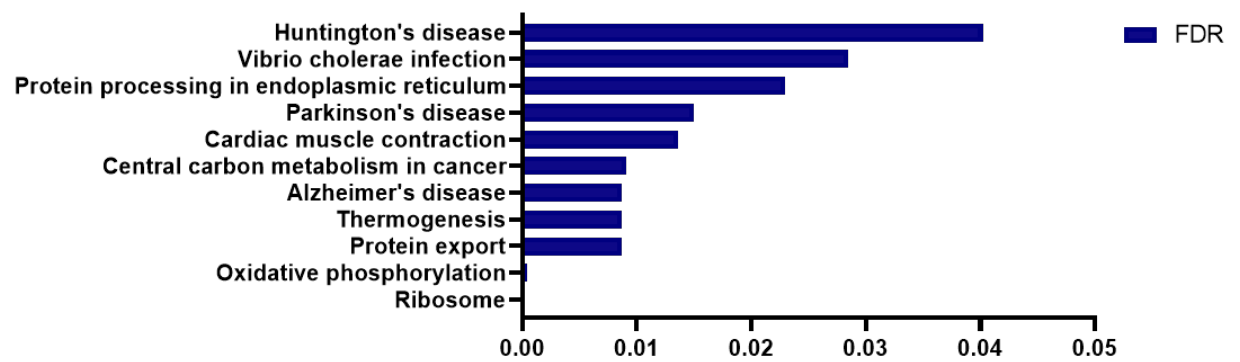

**Figure S6.** Analysis of STRING v11.0-generated SFXN1 interactome reveals pathways linked to ribosome and OXPHOS. KEGG pathways with a false discovery rate (FDR) below 0.05 are listed.

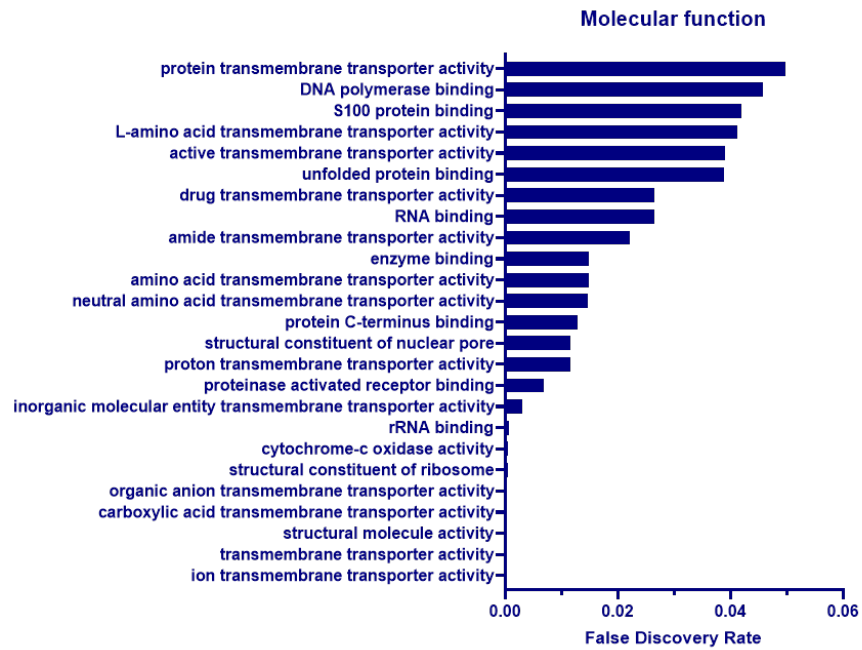

**Figure S7.** Analysis of STRING v11.0-generated SFXN1 interactome reveals molecular functions linked to transporter activity, COX activity and RNA binding. Molecular functions linked to SFXN1 physical partners are listed according to the FDR.

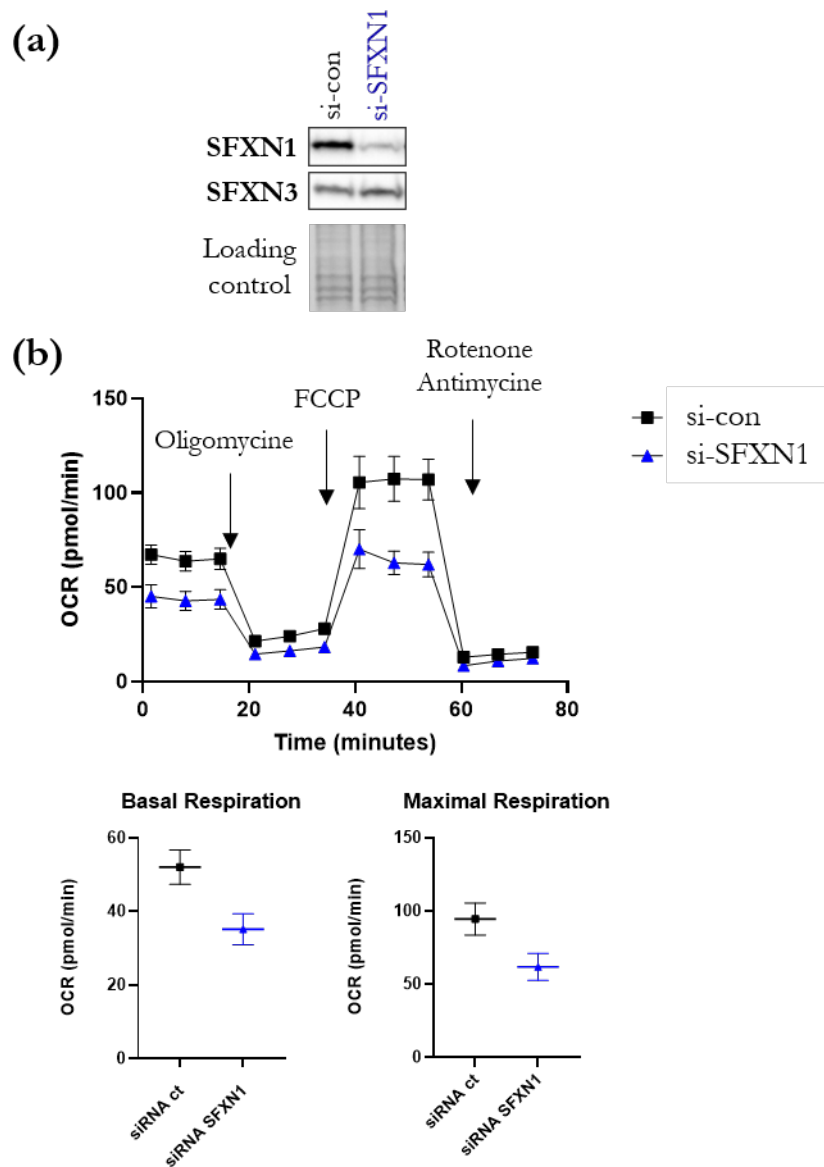

**Figure S8.** Knockdown of SFXN1 in MCF7 cells impairs mitochondrial respiration. (a) Validation of SFXN1 knockdown by Western blot. SFXN3 was also detected as a control of the SFXN1 siRNA specificity. si-con: siRNA with scrambled sequence; si-SFXN1: pool of three siRNA targeting SFXN1 transcripts. Stain-free detection of proteins served as a loading control. (b) Seahorse experiment to monitor oxygen consumption rate of transiently transfected MCF7 cells (Mito Stress Test, Agilent).

**Table S1.** Proteins identified with MS/MS solely in the SFXN1 IP.

| Name                    | #Pept <sup>1</sup> | #PSM <sup>2</sup> | Score | Name                    | #Pept <sup>1</sup> | #PSM <sup>2</sup> | Score |
|-------------------------|--------------------|-------------------|-------|-------------------------|--------------------|-------------------|-------|
| <b>Sideroflexin-1</b>   | 11                 | 17                | 605   | CD98                    | 1                  | 1                 | 39    |
| <b>Sideroflexin-3</b>   | 10                 | 11                | 367   | Delta(6) desaturase     | 2                  | 2                 | 38    |
| <b>Sideroflexin-2</b>   | 5                  | 7                 | 328   | XLalphas                | 2                  | 2                 | 38    |
| Vimentin                | 9                  | 10                | 224   | hnRNP M                 | 1                  | 1                 | 38    |
| MGST1                   | 2                  | 3                 | 169   | Desmoyokin              | 1                  | 1                 | 37    |
| ATAD3A                  | 5                  | 5                 | 124   | COX6A1                  | 1                  | 1                 | 36    |
| <b>Sideroflexin-5</b>   | 2                  | 2                 | 123   | RAB2B                   | 2                  | 2                 | 36    |
| GLUT-1                  | 1                  | 2                 | 113   | HSP 75                  | 1                  | 1                 | 36    |
| KCP-2                   | 2                  | 2                 | 109   | TMEM33                  | 1                  | 1                 | 35    |
| MRP-L12                 | 1                  | 1                 | 96    | Nucleoporin Nup205      | 1                  | 1                 | 35    |
| 17-beta-HSD 10          | 3                  | 4                 | 95    | LPLAT 7                 | 1                  | 1                 | 34    |
| ValRS                   | 2                  | 2                 | 94    | PISD                    | 1                  | 1                 | 34    |
| hLAT1                   | 1                  | 1                 | 89    | SMARCA1                 | 1                  | 1                 | 33    |
| MPC2                    | 1                  | 1                 | 89    | Prohibitin-2            | 1                  | 1                 | 33    |
| PIP5K1A-PSMD4           | 1                  | 1                 | 87    | MFTC                    | 1                  | 1                 | 33    |
| Tropomodulin-3          | 1                  | 2                 | 84    | COX11                   | 1                  | 1                 | 33    |
| RCF1b                   | 1                  | 1                 | 81    | Zinc finger protein 281 | 1                  | 1                 | 32    |
| ELOVL FA elongase 1     | 1                  | 1                 | 78    | DAD-1                   | 1                  | 2                 | 32    |
| Nucleoporin Nup160      | 1                  | 1                 | 77    | HSP86                   | 1                  | 1                 | 32    |
| MP68                    | 1                  | 2                 | 75    | TIM50                   | 1                  | 1                 | 32    |
| TIMMDC1                 | 1                  | 1                 | 75    | Dysferlin               | 1                  | 1                 | 31    |
| Nrap                    | 1                  | 1                 | 75    | COX6C                   | 1                  | 1                 | 30    |
| COMTD1                  | 1                  | 1                 | 75    | TRIP-12                 | 1                  | 1                 | 30    |
| IMP-1                   | 1                  | 1                 | 74    | Prohibitin              | 2                  | 2                 | 30    |
| SMIM7                   | 1                  | 1                 | 73    | TMEM126A                | 1                  | 1                 | 29    |
| RPS17                   | 2                  | 2                 | 67    | DNA-PKcs                | 2                  | 2                 | 28    |
| Tim17a                  | 1                  | 1                 | 65    | Hp95                    | 1                  | 1                 | 28    |
| EXOC1                   | 1                  | 1                 | 63    | UFL1                    | 1                  | 1                 | 28    |
| Sec61 alpha-1           | 1                  | 1                 | 63    | Dnj3                    | 1                  | 1                 | 27    |
| ATP6V0C                 | 1                  | 1                 | 60    | MCT 4                   | 1                  | 1                 | 27    |
| SPC22/23                | 1                  | 1                 | 56    | Cytokeratin-10          | 1                  | 2                 | 26    |
| TMEM209                 | 1                  | 1                 | 55    | Beta-III spectrin       | 1                  | 1                 | 26    |
| N-acetyltransferase 10  | 1                  | 1                 | 55    | ATB(0)                  | 1                  | 1                 | 25    |
| Nudix motif 8           | 1                  | 1                 | 54    | hPAST1                  | 2                  | 2                 | 25    |
| COX7A2                  | 1                  | 1                 | 51    | MRM3                    | 1                  | 1                 | 25    |
| Fetuin-A                | 1                  | 1                 | 50    | TMEM111                 | 1                  | 1                 | 24    |
| MTP18                   | 1                  | 1                 | 49    | Nucleoporin Nup358      | 1                  | 1                 | 23    |
| CAS                     | 1                  | 1                 | 49    | SCY1-like protein 1     | 1                  | 1                 | 23    |
| MT-ND2                  | 1                  | 1                 | 48    | Alpha1-adaptin          | 1                  | 1                 | 20    |
| hTom22                  | 1                  | 1                 | 48    | SKAP                    | 1                  | 1                 | 20    |
| LMN2R                   | 1                  | 1                 | 48    | Alpha-II spectrin       | 1                  | 1                 | 20    |
| MTA1-L1 protein         | 1                  | 1                 | 46    | DEAD box protein 39     | 1                  | 1                 | 19    |
| Plectin                 | 2                  | 2                 | 46    | SERCA2                  | 1                  | 1                 | 19    |
| Coronin-1C              | 1                  | 1                 | 44    | BiP                     | 1                  | 1                 | 18    |
| MYH-1c                  | 1                  | 1                 | 43    | RPS14                   | 1                  | 2                 | 17    |
| NDUFA10                 | 1                  | 1                 | 43    | SLC25A12                | 1                  | 1                 | 16    |
| Ras-like protein TC21   | 2                  | 2                 | 43    | <b>Sideroflexin-4</b>   | 1                  | 1                 | 15    |
| Surfeit locus protein 4 | 2                  | 2                 | 43    | Dystonin                | 1                  | 1                 | 14    |
| Apoptosis inhibitor 5   | 1                  | 1                 | 41    |                         |                    |                   |       |

<sup>1</sup> Pept corresponds to the number of distinct peptide sequences.<sup>2</sup> PSM corresponds to the total number of identified peptide sequences for a protein.

**Table S2.** Biological processes related to the SFXN1 using PANTHER. Table showing the total number of proteins in each biological process (Group), the number of binding partners identified (Identified), the fold enrichment, the *p* value and the false discovery rate (FDR).

| GO biological process complete                     | Group | Identified | Fold Enrichment | Raw P value           | FDR                   |
|----------------------------------------------------|-------|------------|-----------------|-----------------------|-----------------------|
| Mitochondrion organization                         | 438   | 13         | 6.44            | $1.46 \times 10^{-7}$ | $2.55 \times 10^{-4}$ |
| Intracellular protein transport                    | 937   | 18         | 4.17            | $3.01 \times 10^{-7}$ | $4.29 \times 10^{-4}$ |
| Electron transport chain                           | 176   | 7          | 8.63            | $2.17 \times 10^{-5}$ | $1.41 \times 10^{-2}$ |
| Establishment of protein localization to organelle | 414   | 10         | 5.24            | $2.52 \times 10^{-5}$ | $1.58 \times 10^{-2}$ |
| Iron ion homeostasis                               | 83    | 5          | 13.07           | $5.32 \times 10^{-5}$ | $2.77 \times 10^{-2}$ |
| L-alpha-amino acid transmembrane transport         | 44    | 4          | 19.72           | $6.94 \times 10^{-5}$ | $3.51 \times 10^{-2}$ |
| Mitochondrial transmembrane transport              | 89    | 5          | 12.19           | $7.29 \times 10^{-5}$ | $3.57 \times 10^{-2}$ |
| Cellular component biogenesis                      | 2666  | 27         | 2.20            | $8.12 \times 10^{-5}$ | $3.74 \times 10^{-2}$ |
| Protein import                                     | 158   | 6          | 8.24            | $1.10 \times 10^{-4}$ | $4.78 \times 10^{-2}$ |

**Table S3.** Proteins identified in each biological process. Potential binding partners of SFXN1 with a FDR below 0.05 were analyzed with the online PANTHER classification system using the PANTHER Overrepresentation test (Release date 20171205) and the gene ontology biological process complete data set.

| <b>mitochondrion organization</b>                                                                                                                                                                                                                | <b>establishment of protein localization to organelle</b>                                                                                                                                                                                                                                                                                                                 | <b>cellular component biogenesis</b>                                                                                                                                                      |
|--------------------------------------------------------------------------------------------------------------------------------------------------------------------------------------------------------------------------------------------------|---------------------------------------------------------------------------------------------------------------------------------------------------------------------------------------------------------------------------------------------------------------------------------------------------------------------------------------------------------------------------|-------------------------------------------------------------------------------------------------------------------------------------------------------------------------------------------|
| Tim17a<br>Prohibitin<br>COX7A2<br>MTP18<br>TIM50<br>TIMMDC1<br>17-beta-HSD 10<br>hTom22<br>Prohibitin-2<br>NDUFA10<br>HSP86<br>ATAD3A<br>MT-ND2                                                                                                  | RPS14<br>RPS17<br>Tim17a<br>Nucleoporin Nup358<br>TIM50<br>hTom22<br>Sec61 alpha-1<br>Prohibitin-2<br>SPC22/23<br>HSP86<br><b>iron ion homeostasis</b>                                                                                                                                                                                                                    | Nucleoporin Nup205<br>MGST1<br>Cytokeratin-10<br>17-beta-HSD 10<br>ATB(0)<br>COX11<br>Tropomodulin-3<br>Plectin<br>Desmoyokin<br>NDUFA10<br>Dystonin<br>GLUT-1<br>HSP86<br>Hp95<br>MT-ND2 |
| <b>intracellular protein transport</b>                                                                                                                                                                                                           | Sideroflexin-1<br>Sideroflexin-3<br>Sideroflexin-4<br>Sideroflexin-2<br>Sideroflexin-5                                                                                                                                                                                                                                                                                    | <b>protein import</b>                                                                                                                                                                     |
| RPS14<br>RPS17<br>IMP-1<br>Nrap<br>Tim17a<br>Nucleoporin Nup358<br>DEAD box protein 39<br>hPAST1<br>TIM50<br>Nucleoporin Nup205<br>Alpha1-adaptin<br>RAB2B<br>Nucleoporin Nup160<br>hTom22<br>Sec61 alpha-1<br>Prohibitin-2<br>SPC22/23<br>HSP86 | <b>L-alpha-amino acid transmembrane transport</b><br>SLC25A12<br>CD98<br>ATB(0)<br>hLAT1<br><b>mitochondrial transmembrane transport</b><br>Tim17a<br>SLC25A12<br>MPC2<br>TIM50<br>MFTC<br><b>cellular component biogenesis</b><br>MRM3<br>RPS14<br>RPS17<br>IMP-1<br>Nrap<br>hPAST1<br>CAS<br>COX7A2<br>Beta-III spectrin<br>MYH-1c<br>N-acetyltransferase 10<br>TIMMDC1 | Tim17a<br>Nucleoporin Nup358<br>TIM50<br>hTom22<br>Prohibitin-2<br>HSP86                                                                                                                  |
| <b>electron transport chain</b>                                                                                                                                                                                                                  |                                                                                                                                                                                                                                                                                                                                                                           |                                                                                                                                                                                           |
| SLC25A12<br>COX6C<br>COX7A2<br>COX6A1<br>COX11<br>NDUFA10<br>MT-ND2                                                                                                                                                                              |                                                                                                                                                                                                                                                                                                                                                                           |                                                                                                                                                                                           |

**Table S4.** Biological pathways related to the SFXN1 binding partners using REACTOME. Pathways related to the binding partners of SFXN1 with a FDR below 0.05 using REACTOME. The total number of proteins in each biological process (Group), the number of binding partners identified (Identified), the fold enrichment, the *p* value and the false discovery rate (FDR) are shown.

| Biological pathways                                                                                                 | Group | Identified | P value               | FDR                   |
|---------------------------------------------------------------------------------------------------------------------|-------|------------|-----------------------|-----------------------|
| The citric acid (TCA) cycle and respiratory electron transport                                                      | 175   | 9          | $3.00 \times 10^{-5}$ | $7.27 \times 10^{-3}$ |
| Respiratory electron transport                                                                                      | 101   | 7          | $3.75 \times 10^{-5}$ | $7.27 \times 10^{-3}$ |
| Respiratory electron transport, ATP synthesis by chemiosmotic coupling, and heat production by uncoupling proteins. | 124   | 7          | $1.34 \times 10^{-4}$ | $1.72 \times 10^{-2}$ |
| Caspase-mediated cleavage of cytoskeletal proteins                                                                  | 12    | 3          | $1.84 \times 10^{-4}$ | $1.79 \times 10^{-2}$ |

**Table S5.** List of the antibodies used in this study.

| Primary antibodies                                         |            |               |          |                                                               |                |
|------------------------------------------------------------|------------|---------------|----------|---------------------------------------------------------------|----------------|
| Antibodies                                                 | Clonality  | Host Organism | Dilution | RRID                                                          | Provider       |
| Anti-SFXN1                                                 | polyclonal | rabbit        | 1:1000   | Sigma-Aldrich Cat# HPA019543, RRID:AB_1856789                 | Sigma          |
| Anti-SFXN1                                                 | polyclonal | rabbit        | 1:1000   | Atlas Antibodies Cat# HPA063745, RRID:AB_2685111              | Sigma          |
| Anti-SFXN3                                                 | polyclonal | rabbit        | 1:1000   | Atlas Antibodies Cat# HPA048105, RRID:AB_2680265              | Sigma          |
| OctA-Probe (H-5) antibody                                  | monoclonal | mouse         | 1:200    | Santa Cruz Biotechnology Cat# sc-166355, RRID:AB_2017593      | Santa Cruz     |
| Anti-F1F0 (ATP5b)                                          | monoclonal | mouse         | 1:1000   | Abcam Cat# ab14730, RRID:AB_301438                            | Abcam          |
| Anti-ATAD3A/B/C                                            | monoclonal | mouse         | 1:200    | Santa Cruz Biotechnology Cat# sc-376185, RRID:AB_10988379     | Santa Cruz     |
| Anti-ERAB (17 $\beta$ -HSD10)                              | monoclonal | mouse         | 1:200    | Santa Cruz Biotechnology Cat# sc-136326, RRID:AB_10647087     | Santa Cruz     |
| Anti-Cytochrome C                                          | monoclonal | mouse         | 1:1000   | BD Biosciences Cat# 556432, RRID:AB_396416                    | BD Biosciences |
| Anti-TOM40                                                 | polyclonal | rabbit        | 1:200    | Santa Cruz Biotechnology Cat# sc-11414, RRID:AB_793274        | Santa Cruz     |
| Anti-TOM20                                                 | polyclonal | rabbit        | 1:200    | Santa Cruz Biotechnology Cat# sc-11415, RRID:AB_2207533       | Santa Cruz     |
| Anti-Tubulin beta                                          | monoclonal | mouse         | 1:200    | Cat# E7, RRID:AB_528499                                       | DSHB           |
| Anti-Tim50                                                 | monoclonal | mouse         | 1:200    | Santa Cruz Biotechnology Cat# sc-393678, RRID:AB_2714191      | Santa Cruz     |
| Anti-NDUFA10                                               | monoclonal | mouse         | 1:200    | Santa Cruz Biotechnology Cat# sc-376357, RRID:AB_10990305     | Santa Cruz     |
| Secondary antibodies                                       |            |               |          |                                                               |                |
| Antibodies                                                 | Clonality  | Host Organism | Dilution | RRID                                                          | Provider       |
| Mouse Normal IgG Control antibody, Unconjugated, Millipore | polyclonal | mouse         |          | Millipore Cat# 12-371, RRID:AB_145840                         | Millipore      |
| Peroxidase AffiniPure Goat Anti-Rabbit IgG (H+L)           | polyclonal | goat          | 1:5000   | Jackson ImmunoResearch Labs Cat# 111-035-003, RRID:AB_2313567 | Jackson        |
| anti-mouse HRP-conjugated secondary antibody               | polyclonal | goat          | 1:20,000 | Advansta Cat# R-05071-500, RRID:AB_10718209                   | Advansta       |
| anti-Rabbit AlexaFluor488                                  | polyclonal | goat          | 1:200    | Thermo Fisher Scientific Cat# A-11008, RRID:AB_143165         | Thermo Fisher  |
| anti-Rabbit AlexaFluor568                                  | polyclonal | goat          | 1:200    | Thermo Fisher Scientific Cat# A-11011, RRID:AB_143157         | Thermo Fisher  |
| anti-Mouse AlexaFluor568                                   | polyclonal | goat          | 1:200    | Thermo Fisher Scientific, catalog # A-11004, RRID AB_2534072  | Thermo Fisher  |

**Table S6.** Cell lines used in this study.

| <b>Cells</b> | <b>Cell Line Description</b>                                  | <b>Provenance</b>                 | <b>RRID</b>                         |
|--------------|---------------------------------------------------------------|-----------------------------------|-------------------------------------|
| A2780        | Human ovarian carcinoma derived cell line                     | ECACC, Sigma-Aldrich              | ECACC Cat# 93112519, RRID:CVCL_0134 |
| A2780Cis     | Cisplatin-resistant human ovarian carcinoma derived cell line | ECACC, Sigma-Aldrich              | ECACC Cat# 93112517, RRID:CVCL_1942 |
| COV434       | Human ovarian cancer derived cell line                        | Kind gift from Sandrine Caburet   | ECACC Cat# 07071909, RRID:CVCL_2010 |
| HCT116       | Human colon cancer derived cell line                          | Our lab                           | CVCL_0291                           |
| HEK293       | Human embryonic kidney 293 cells                              | Our lab                           | CVCL_0045                           |
| HeLa         | Human cervical cancer derived cell line                       | Our lab                           | CVCL_0030                           |
| HepG2        | Human liver carcinoma derived cell line                       | Kind gift from Delphine Sitterlin | CVCL_0027                           |
| HT1080       | Fibrosarcoma derived cell line                                | Our lab                           | CVCL_0317                           |
| KGN          | Human granulosa-like tumor derived cell line                  | Kind gift from Sandrine Caburet   | CVCL_0375                           |
| MCF-7        | Human breast cancer cell line                                 | Kind gift from Philippe Juin      | CVCL_0031                           |
| MDA-MB-231   | Human breast cancer derived cell line                         | Kind gift from Philippe Juin      | CVCL_0062                           |
| MDA-MB-468   | Human breast cancer derived cell line                         | Kind gift from Philippe Juin      | CVCL_0419                           |
| MEFSV40      | Mouse immortalized embryonic fibroblasts                      | Kind gift from Richard Flavell    | CVCL_U630                           |
| PC12         | Rat derived pheochromocytoma                                  | Our lab                           | CVCL_0481                           |
| RKO          | Human colon carcinoma derived cell line                       | Our lab                           | CVCL_0504                           |
| SH-SY5Y      | Human neuroblastoma derived cell line                         | ATCC                              | ATCC Cat# CRL-2266, RRID:CVCL_0019  |
| T-47D        | Human breast cancer derived cell line                         | Kind gift from Philippe Juin      | CVCL_0553                           |

**Table S7.** Plasmids used in this study (related to Figure S3, purchased from Genscript).

| Protein | Cloning Vector      | Clone ID | Gene Symbol | Accession Number |
|---------|---------------------|----------|-------------|------------------|
| SFXN1   | pcDNA3.1+/C-(K)-DYK | OHu31628 | SFXN1       | NM_022754.6      |
| SFXN2   | pcDNA3.1+/C-(K)-DYK | OHu14540 | SFXN2       | NM_178858.5      |
| SFXN4   | pcDNA3.1+/C-(K)-DYK | OHu25980 | SFXN4       | NM_213649.1      |
| SFXN5   | pcDNA3.1+/C-(K)-DYK | OHu17388 | SFXN5       | NM_144579.2      |
